# Supplementary figures and images for: Functionalization and solubilization of inorganic nanostructures and carbon nanotubes by employing organosilicon and organotin reagents
Source: Royal Society of Chemistry journal article supplement (doi:10.1039/b813570c), 2008-11-19

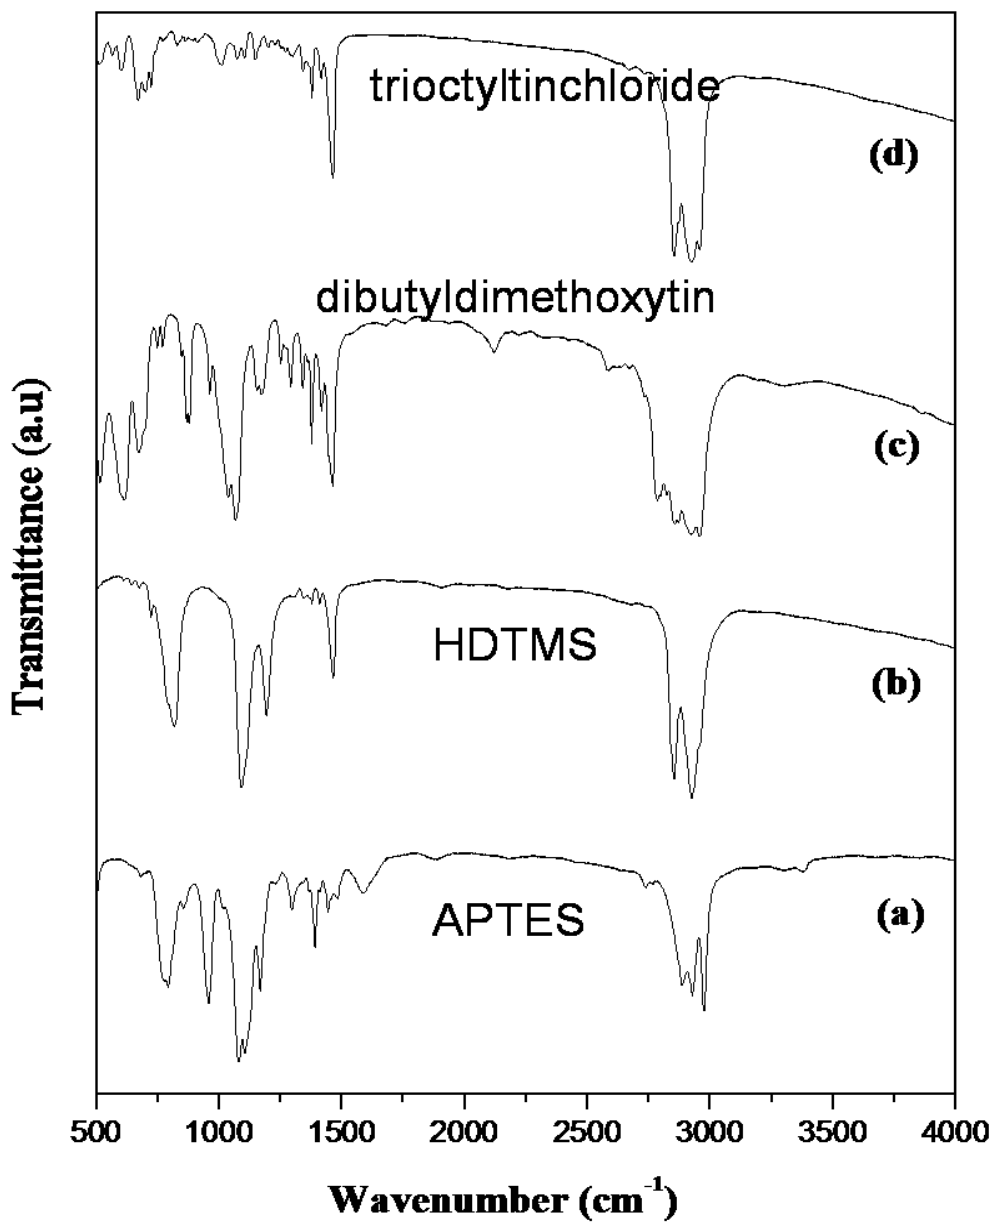

**S1**

Supplement: b813570c.pdf [file b813570c.pdf]
